# Supplementary material for: Preparation and enhanced photocatalytic hydrogen-evolution activity of ZnGa2O4/N-rGO heterostructures
Source: Royal Society of Chemistry journal article supplement (doi:10.1039/c7ra09981a), 2017-01-01
Supplement: c7ra09981a1.pdf [file c7ra09981a1.pdf]

Electronic Supplementary Information

**Preparation and enhanced photocatalytic hydrogen-evolution  
activity of ZnGa<sub>2</sub>O<sub>4</sub>/N-rGO heterostructures**

X. P. Bai,<sup>a</sup> X. Zhao<sup>b</sup> and W. L. Fan<sup>a\*</sup>

<sup>a</sup> Key Laboratory for Colloid and Interface Chemistry of State Educating Ministry,  
School of Chemistry and Chemical Engineering, Shandong University, Jinan 250100,  
China. Fax: +86-531-88364864; Tel: +86-531-88366330; E-mail: fwl@sdu.edu.cn

<sup>b</sup> State Key Laboratory of Crystal Materials, Shandong University, Jinan 250100, China

Financial support from the National Natural Science Foundation of China (Grant No. 21173131 and 21771119) and the Taishan Scholar Project of Shandong Province is gratefully acknowledged.

Table S1. The synthesis parameters of the samples

| Samples                                                                           | ZnGa <sub>2</sub> O <sub>4</sub> -x | ZnGa <sub>2</sub> O <sub>4</sub> /rGO | ZnGa <sub>2</sub> O <sub>4</sub> /N-rGO |
|-----------------------------------------------------------------------------------|-------------------------------------|---------------------------------------|-----------------------------------------|
| Zn(NO <sub>3</sub> ) <sub>2</sub> ·6H <sub>2</sub> O/mg                           | 0.298                               | \                                     | \                                       |
| Ga(NO <sub>3</sub> ) <sub>3</sub> ·xH <sub>2</sub> O/mg                           | 0.512                               | \                                     | \                                       |
| C <sub>6</sub> H <sub>5</sub> Na <sub>3</sub> O <sub>7</sub> ·2H <sub>2</sub> O/g | x                                   | \                                     | \                                       |
| deionized water/mL                                                                | 80                                  | 30                                    | 30                                      |
| pH                                                                                | 8.86                                | \                                     | \                                       |
| ZnGa <sub>2</sub> O <sub>4</sub> nanospheres/g                                    | \                                   | 0.120                                 | 0.120                                   |
| GO solution (1 mg/mL)                                                             | \                                   | 3 mL                                  | \                                       |
| NGO suspension(1 mg/mL)                                                           | \                                   | \                                     | 3 mL                                    |

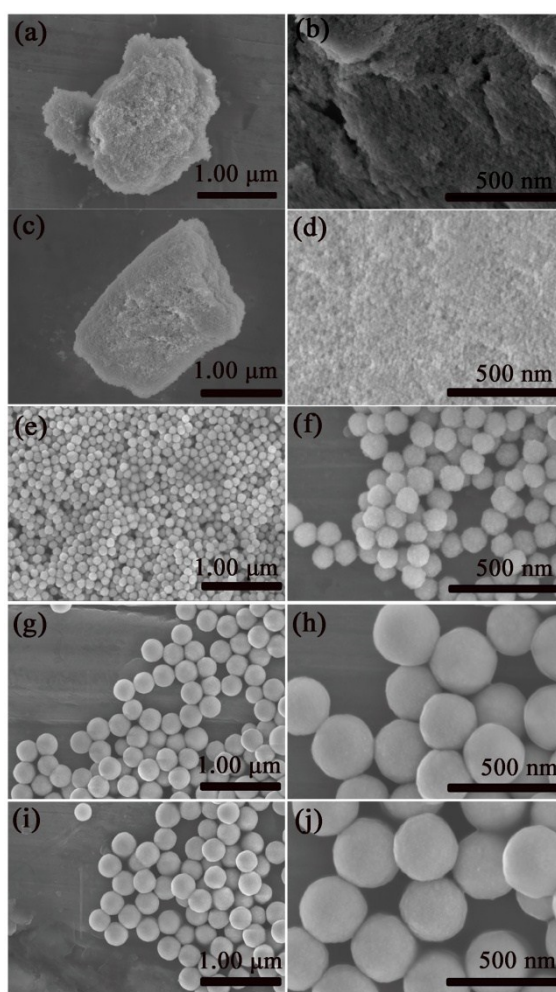

Fig. S1 SEM images of the ZnGa<sub>2</sub>O<sub>4</sub> with different amount of surfactant trisodium citrate: (a, b) ZnGa<sub>2</sub>O<sub>4</sub>-0; (c, d) ZnGa<sub>2</sub>O<sub>4</sub>-0.25; (e, f) ZnGa<sub>2</sub>O<sub>4</sub>-0.30; (g, h) ZnGa<sub>2</sub>O<sub>4</sub>-0.35 and (i, j) ZnGa<sub>2</sub>O<sub>4</sub>-0.40.

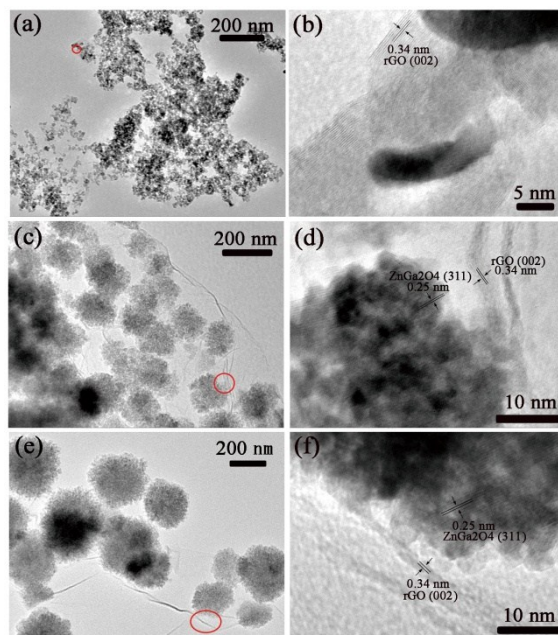

Fig. S2 TEM and HRTEM images of the samples: (a, b)  $\text{ZnGa}_2\text{O}_4$ -0.25/rGO; (c, d)  $\text{ZnGa}_2\text{O}_4$ -0.30/rGO; (e, f)  $\text{ZnGa}_2\text{O}_4$ -0.35/rGO.

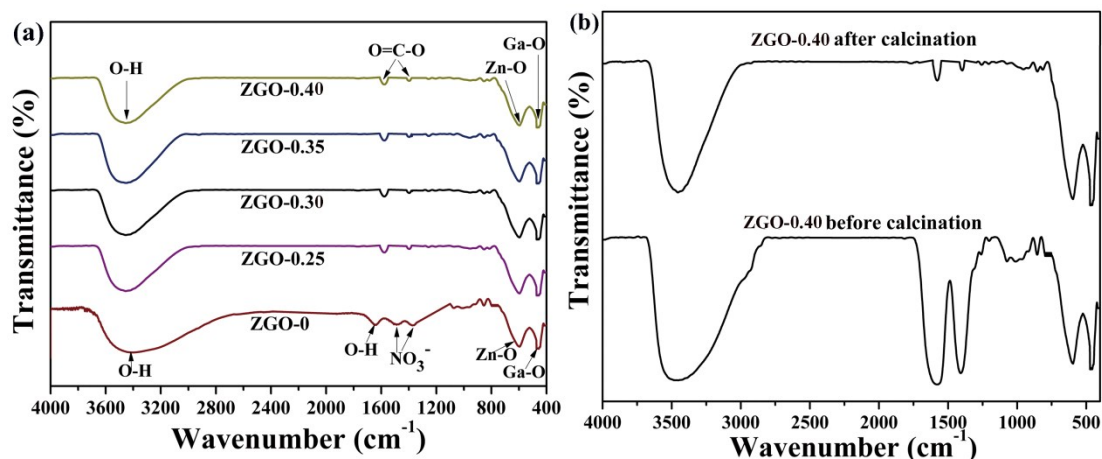

Fig. S3 FT-IR spectra of (a) the  $\text{ZnGa}_2\text{O}_4$  with different size:  $\text{ZnGa}_2\text{O}_4$ -0;  $\text{ZnGa}_2\text{O}_4$ -0.25;  $\text{ZnGa}_2\text{O}_4$ -0.30;  $\text{ZnGa}_2\text{O}_4$ -0.35;  $\text{ZnGa}_2\text{O}_4$ -0.40 and (b)  $\text{ZnGa}_2\text{O}_4$ -0.40 before and after calcinations at 400 °C.

The FT-IR spectra of the as-prepared  $\text{ZnGa}_2\text{O}_4$  with different size are shown in Fig. S3. The broad and strong band centered at 3425-3454 and 1629-1676  $\text{cm}^{-1}$  is attributed to the O-H stretching and bending vibration of  $\text{H}_2\text{O}$  absorbed by the samples. The bands at 1578 and 1408  $\text{cm}^{-1}$  are ascribed to the vibration of the  $\text{COO}^-$  group from surfactant trisodium citrate.<sup>1</sup> In our system, Citrate ion ( $\text{Cit}^{3-}$ ) as a structure-directing reagent could form  $\text{Zn}^{2+}$ - $\text{Cit}^{3-}$ - $\text{Ga}^{3+}$  complexes to control the nucleation and growth of the crystals, resulting in the formation of  $\text{ZnGa}_2\text{O}_4$  nanospheres.<sup>2</sup> The two obvious bands at 589 and 436  $\text{cm}^{-1}$  can be ascribed to the

characteristic metal-oxygen (Zn-O and Ga-O) vibrations, respectively.<sup>3</sup> We calcined ZnGa<sub>2</sub>O<sub>4</sub> nanospheres to remove the COO<sup>-</sup> group, and the result is shown in Fig. S3 b. After calcination, the vibration of COO<sup>-</sup> group significantly diminished, indicating an effective removal of the COO<sup>-</sup> group.

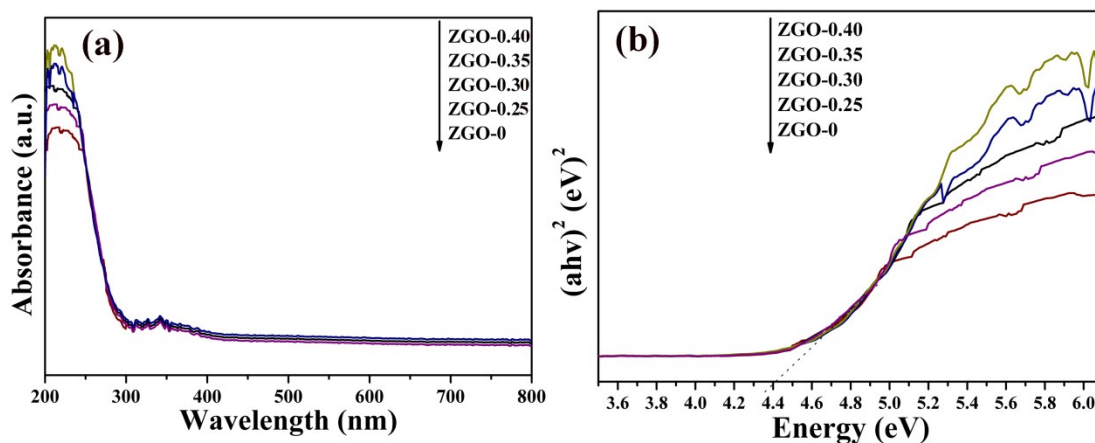

Fig. S4 (a) UV-vis diffuse reflectance spectra and (b) the plot of transformed Kubelka-Munk function versus the energy of the ZnGa<sub>2</sub>O<sub>4</sub> with different size: ZnGa<sub>2</sub>O<sub>4</sub>-0; ZnGa<sub>2</sub>O<sub>4</sub>-0.25; ZnGa<sub>2</sub>O<sub>4</sub>-0.30; ZnGa<sub>2</sub>O<sub>4</sub>-0.35 and ZnGa<sub>2</sub>O<sub>4</sub>-0.40.

Table S2. The BET surface area of the samples

| Samples        | A <sub>BET</sub> (m <sup>2</sup> ·g <sup>-1</sup> ) | Average pore size/nm |
|----------------|-----------------------------------------------------|----------------------|
| ZGO-0          | 57.767                                              | 13.52                |
| ZGO-0.25       | 50.131                                              | 21.33                |
| ZGO-0.30       | 41.448                                              | 28.28                |
| ZGO-0.35       | 35.627                                              | 26.32                |
| ZGO-0.40       | 30.081                                              | 26.78                |
| ZGO-0.25/rGO   | 65.258                                              | 22.72                |
| ZGO-0.25/N-rGO | 66.117                                              | 23.42                |
| ZGO-0.30/rGO   | 57.785                                              | 29.56                |
| ZGO-0.30/N-rGO | 56.308                                              | 31.12                |
| ZGO-0.35/rGO   | 53.41                                               | 27.74                |
| ZGO-0.35/N-rGO | 53.767                                              | 27.98                |

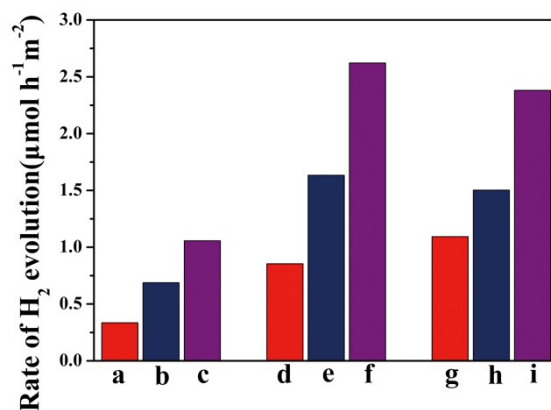

Fig. S5 Photocatalytic water splitting activity normalized by the BET surface areas of (a-c) ZnGa<sub>2</sub>O<sub>4</sub>-0.25, ZnGa<sub>2</sub>O<sub>4</sub>-0.25/rGO, ZnGa<sub>2</sub>O<sub>4</sub>-0.25/N-rGO; (d-f) ZnGa<sub>2</sub>O<sub>4</sub>-0.30, ZnGa<sub>2</sub>O<sub>4</sub>-0.30/rGO, ZnGa<sub>2</sub>O<sub>4</sub>-0.30/N-rGO; (g-i) ZnGa<sub>2</sub>O<sub>4</sub>-0.35, ZnGa<sub>2</sub>O<sub>4</sub>-0.35/rGO, ZnGa<sub>2</sub>O<sub>4</sub>-0.35/N-rGO.

Table S3. Photocatalytic water splitting activity normalized by the BET surface areas and parameters of equivalent circuits for the impedance data of the samples

| Samples        | Rate of H <sub>2</sub> evolution (μmol h <sup>-1</sup> m <sup>-2</sup> ) | R <sub>ct</sub> (10 <sup>5</sup> , Ω cm <sup>2</sup> ) |
|----------------|--------------------------------------------------------------------------|--------------------------------------------------------|
| ZGO-0          | 0.084                                                                    | 17.22                                                  |
| ZGO-0.25       | 0.335                                                                    | 10.22                                                  |
| ZGO-0.30       | 0.781                                                                    | 4.69                                                   |
| ZGO-0.35       | 1.093                                                                    | 3.98                                                   |
| ZGO-0.40       | 1.104                                                                    | 4.06                                                   |
| ZGO-0.25/rGO   | 0.687                                                                    | 5.52                                                   |
| ZGO-0.25/N-rGO | 1.056                                                                    | 4.04                                                   |
| ZGO-0.30/rGO   | 1.634                                                                    | 2.70                                                   |
| ZGO-0.30/N-rGO | 2.621                                                                    | 1.44                                                   |
| ZGO-0.35/rGO   | 1.533                                                                    | 2.84                                                   |
| ZGO-0.35/N-rGO | 2.381                                                                    | 1.80                                                   |

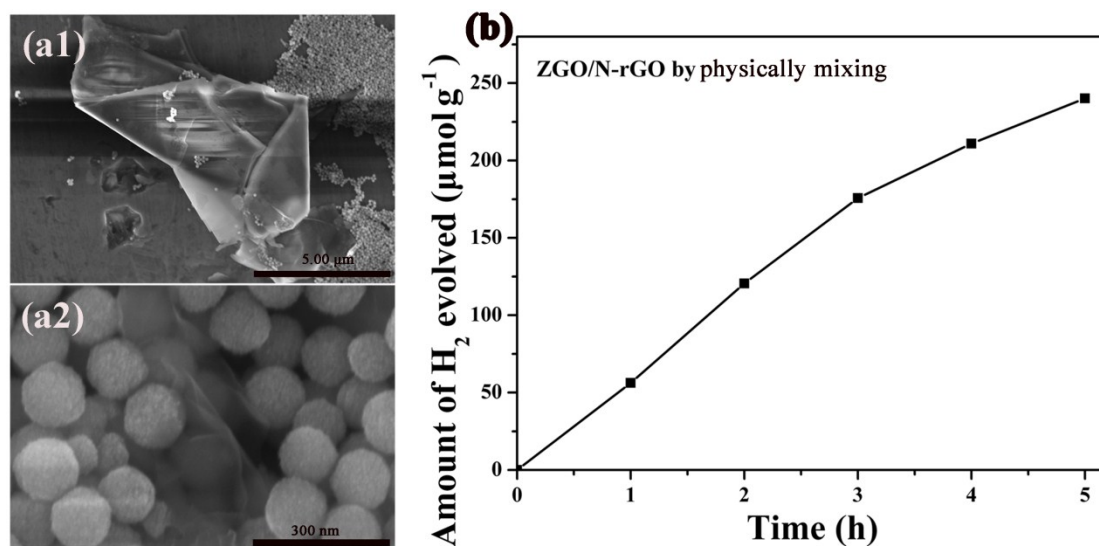

Fig. S6 (a) SEM images and (b) photocatalytic water splitting activity (under the same photocatalytic reaction conditions) of the ZnGa<sub>2</sub>O<sub>4</sub>-0.30/N-rGO sample by physically mixing.

For comparison, the sample of ZnGa<sub>2</sub>O<sub>4</sub>-0.30 and N-rGO composites was prepared by stirred mixing 6 h, which based on the same weight ratio with the ZnGa<sub>2</sub>O<sub>4</sub>-0.30/N-rGO by hydrothermal method. Fig. S6a shows typical SEM images of the ZnGa<sub>2</sub>O<sub>4</sub>-0.30/N-rGO by physically mixing, in which we can clearly see that ZnGa<sub>2</sub>O<sub>4</sub> spheres were not deposited on the surface of the N-rGO sheet. There is no intimate interfacial contact between the ZnGa<sub>2</sub>O<sub>4</sub> spheres and N-rGO for ZnGa<sub>2</sub>O<sub>4</sub>-0.30/N-rGO by physically mixing. Fig. S6b shows the photocatalytic activities of ZnGa<sub>2</sub>O<sub>4</sub>-0.30/N-rGO by physically mixing. The average rate of H<sub>2</sub> production in 5 h was 48.52 μmol h<sup>-1</sup> g<sup>-1</sup>, which was much lower than ZnGa<sub>2</sub>O<sub>4</sub>-0.30/N-rGO by hydrothermal method (147.61 μmol h<sup>-1</sup> g<sup>-1</sup>). The result indicating that intimate interfacial contact between the ZnGa<sub>2</sub>O<sub>4</sub> spheres and N-rGO was beneficial for the separation of photoinduced charge carriers, resulting in enhanced photocatalytic H<sub>2</sub> generation from water splitting.

## Notes and references

- 1 I. F. Li, C.-H. Su, H.-S. Sheu, H.-C. Chiu, Y.-W. Lo, W.-T. Lin, J.-H. Chen and C.-S. Yeh, *Advanced Functional Materials*, 2008, **18**, 766-776.
- 2 Y. Zhang, Z. Wu, D. Geng, X. Kang, M. Shang, X. Li, H. Lian, Z. Cheng and J. Lin, *Advanced Functional Materials*, 2014, **24**, 6581-6593.
- 3 M. Yu, J. Lin, Y. H. Zhou and S. B. Wang, *Materials Letters*, 2002, **56**, 1007-1013.
